# Supplementary material for: Mapping and predictive variations of soil bacterial richness across France
Source: PubMed Central journal article supplement (PMC5653302; doi:10.1371/journal.pone.0186766), 2017-10-23

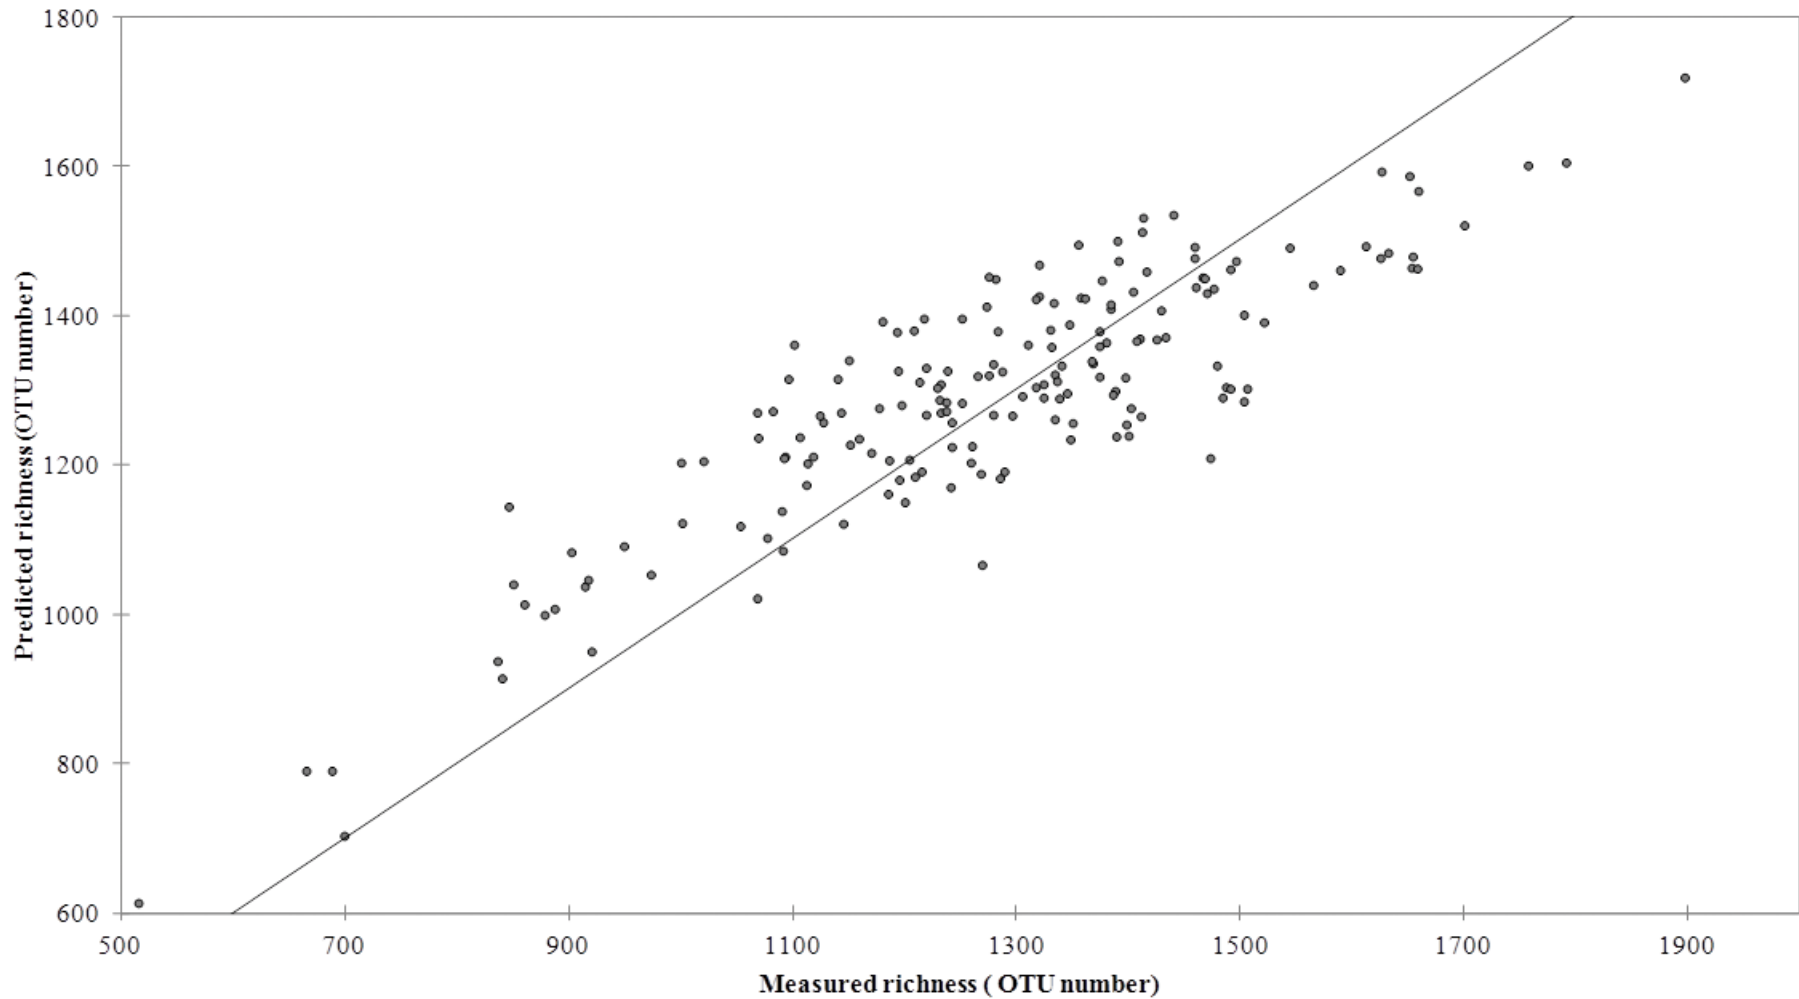

Supplement: pone.0186766.s003.pdf [file pone.0186766.s003.pdf]
